# Supplementary material for: Genome Sequencing and Pan-Genome Analysis of 23 Corallococcus spp. Strains Reveal Unexpected Diversity, With Particular Plasticity of Predatory Gene Sets
Source: Front Microbiol. 2018 Dec 19;9:3187. doi: 10.3389/fmicb.2018.03187 (PMC6306037; doi:10.3389/fmicb.2018.03187)
Supplement: FILE S3 — Predation activity of Corallococcus strains against ten prey organisms (predation zone diameter 7 days after inoculation). [file Table_3.XLS]

## Sheet: Predation_7 Days
Strain	Es. coli	Ps. aeruginosa	K. pneumoniae	Pr. mirabilis	S. aureus	S. epidermidis	S. saprophyticus	Ent. faecalis	B. subtilis	C. albicans
AB004	20	15	27	22	12	15	13	15	32	19
AB018	31	31	41	36	20	31	15	22	15	34
AB030	28	27	30	27	14	21	12	17	35	31
AB032C	24	21	28	31	17	26	11	14	13	37
AB038B	23	28	34	28	16	22	12	21	32	29
AB045	30	20	22	22	14	30	17	21	25	20
AB047A	30	19	35	31	22	32	23	25	40	36
AB049A	29	21	33	31	31	22	25	21	26	30
AB050A	20	22	31	29	16	20	17	17	24	28
AB050B	34	20	41	41	21	37	21	23	40	39
CA031B	31	9	36	28	23	38	25	19	31	45
CA031C	31	9	33	25	14	28	33	17	27	52
CA040B	25	25	35	33	19	24	22	22	28	42
CA041A	25	14	22	27	20	21	21	20	21	28
CA043D	33	30	45	35	35	38	22	29	43	44
CA047B	35	40	51	43	31	34	22	26	40	45
CA049B	35	35	52	37	32	48	25	20	45	45
CA051B	26	20	30	29	25	28	28	21	35	38
CA053C	19	18	26	29	21	22	25	20	32	39
CA054A	23	17	29	23	23	24	16	18	24	26
CA054B	39	28	40	47	26	37	24	28	62	50
AB011P	47	11	50	44	44	43	37	41	43	48
AB043A	30	20	43	34	20	26	20	19	31	33
DSM_2259	25	30	6	19	27	12	15	15	6	6
	Diameter of predation (mm), 7 days after inoculation
